# Supplementary material
Source: Royal Society of Chemistry journal article supplement (doi:10.1039/d6cp00116e)
Supplement: d6cp00116e1.pdf [file d6cp00116e1.pdf]

### Supplementary Information File

Flexible electrospun KNN-MXene/PVDF-HFP composite nanofibers with enhanced dielectric properties for capacitive pressure sensing application

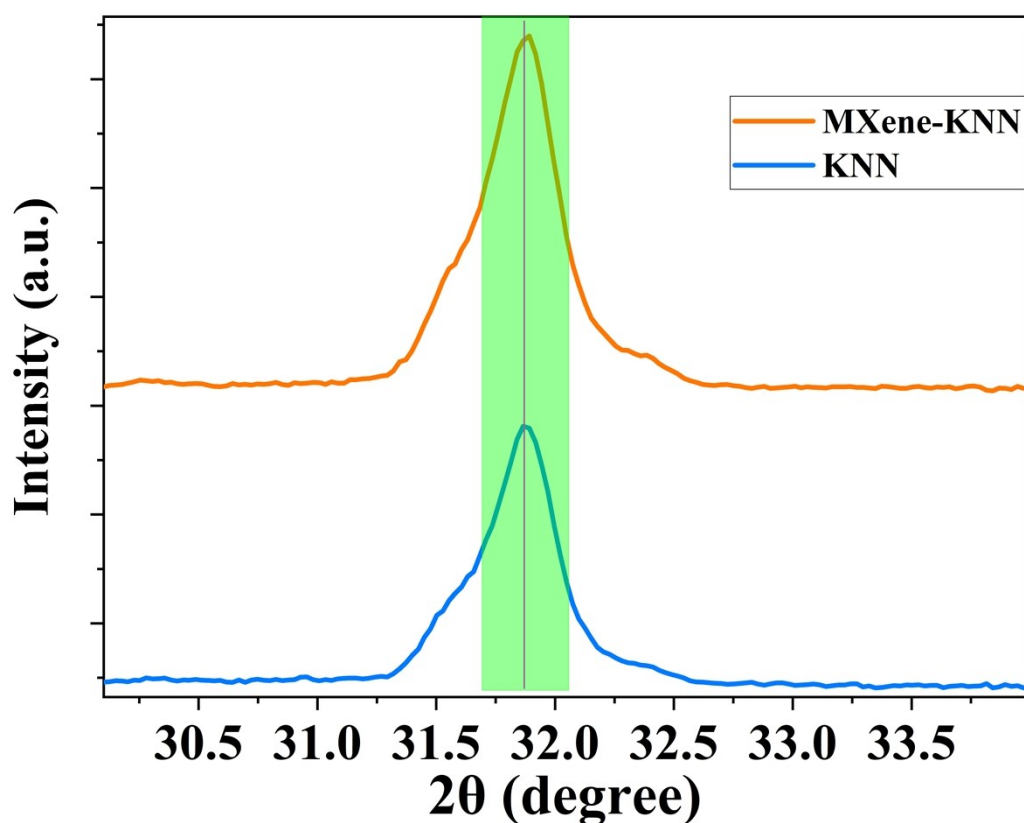

**Figure S1:** The comparison of the X-ray diffraction pattern of KNN and KNN-MXene composite, a shift towards a higher value of  $2\theta$  is observed for the composite

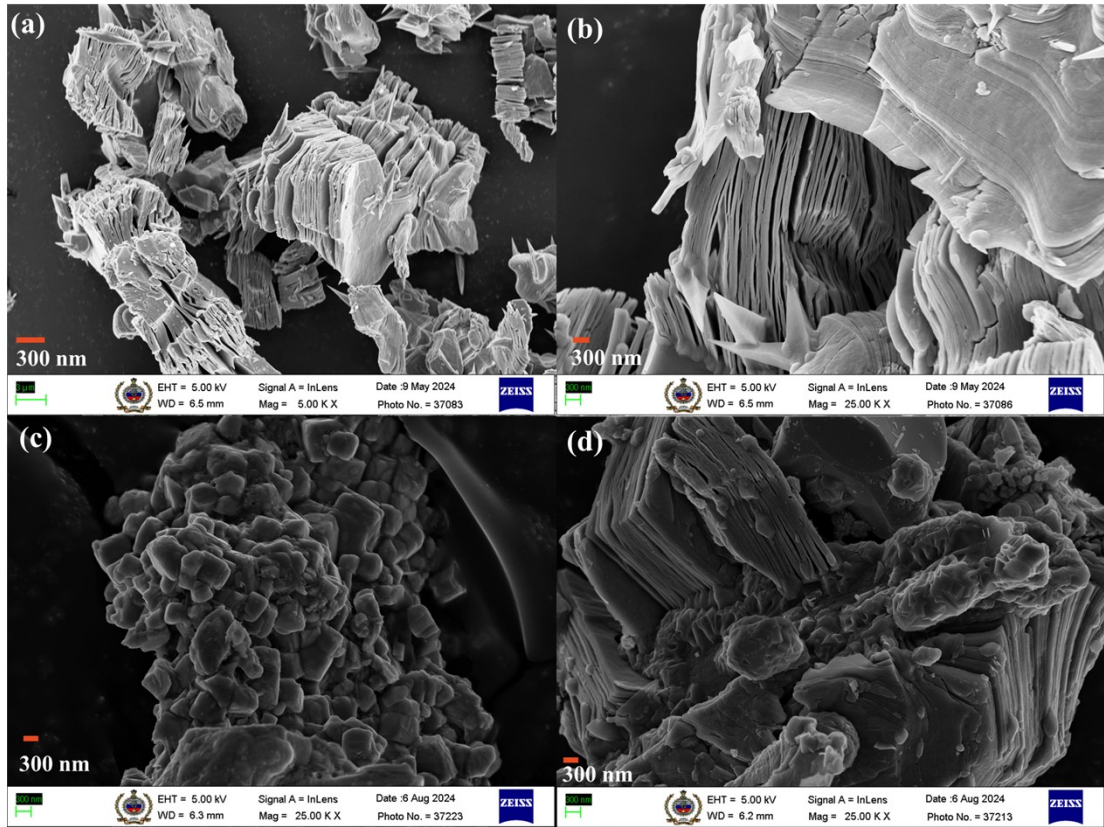

**Figure S2** Scanning electron microscopic images of (a) MXene, (b) MXene (magnified), (c) KNN ceramics, and (d) KNN-MXene ceramics

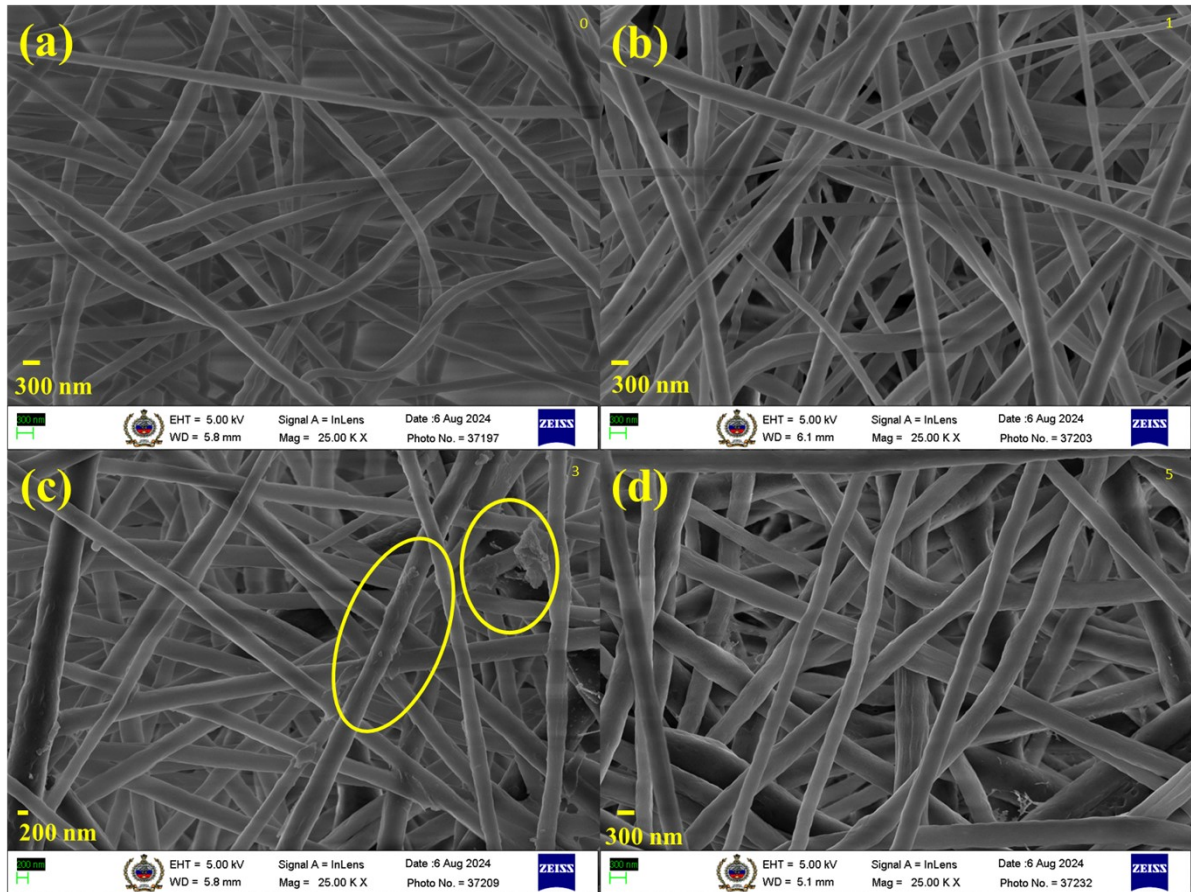

**Figure S3** The SEM images of KNN-MXene/PVDF-HFP composite fibres at higher magnification, showing the presence of filler in 3 wt% KNN-MXene/PVDF-HFP

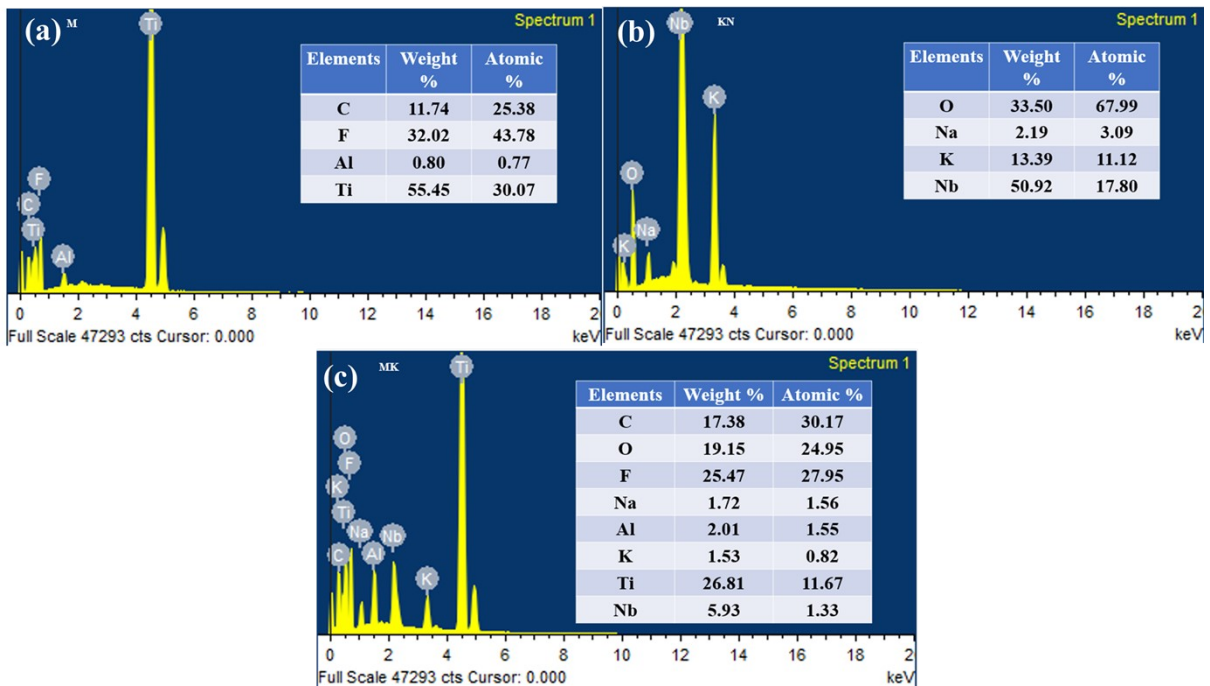

**Figure S4** EDS analysis of (a)MXene, (b) KNN, and (c)MXene-KNN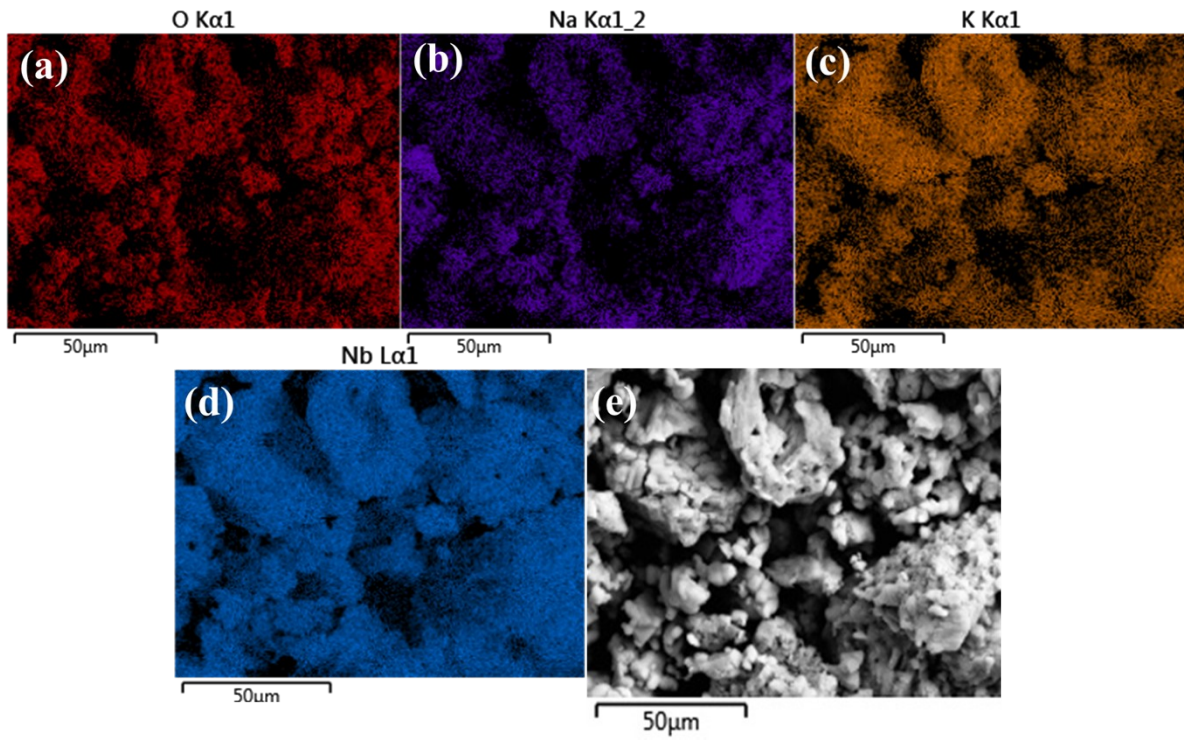**Figure S5** Elemental mapping of KNN ceramics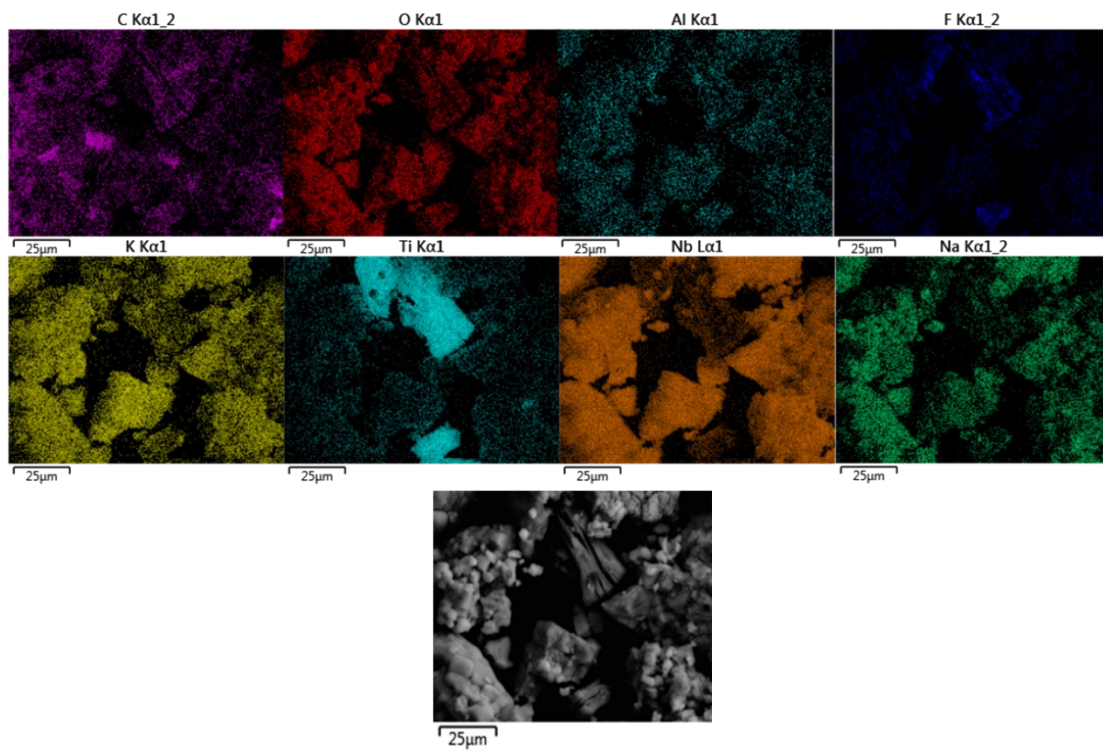**Figure S6** Elemental mapping of KNN-MXene composite

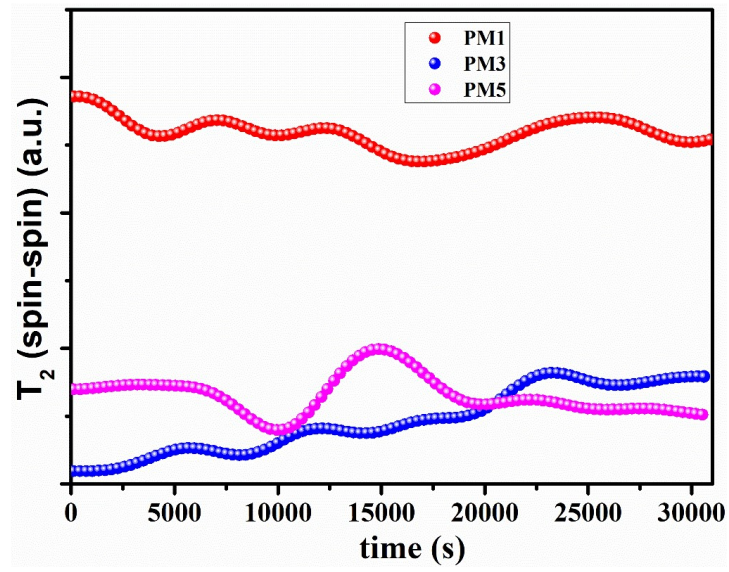

**Figure S7**  $T_2$  spin-spin relaxation studies of KNN-MXene/PVDF-HFP composite fibres

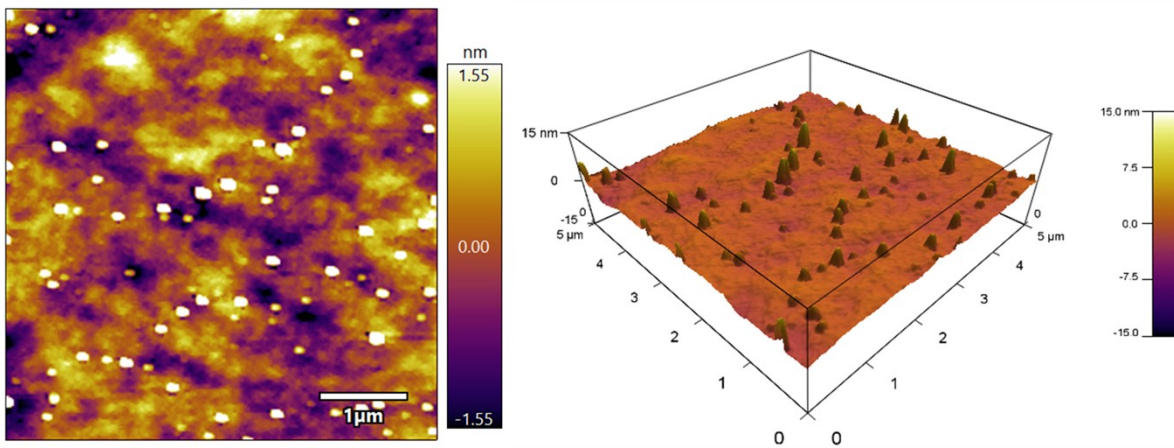

**Figure S8** The atomic force microscopic lateral image, and 3D height profile for KNN-MXene ceramics

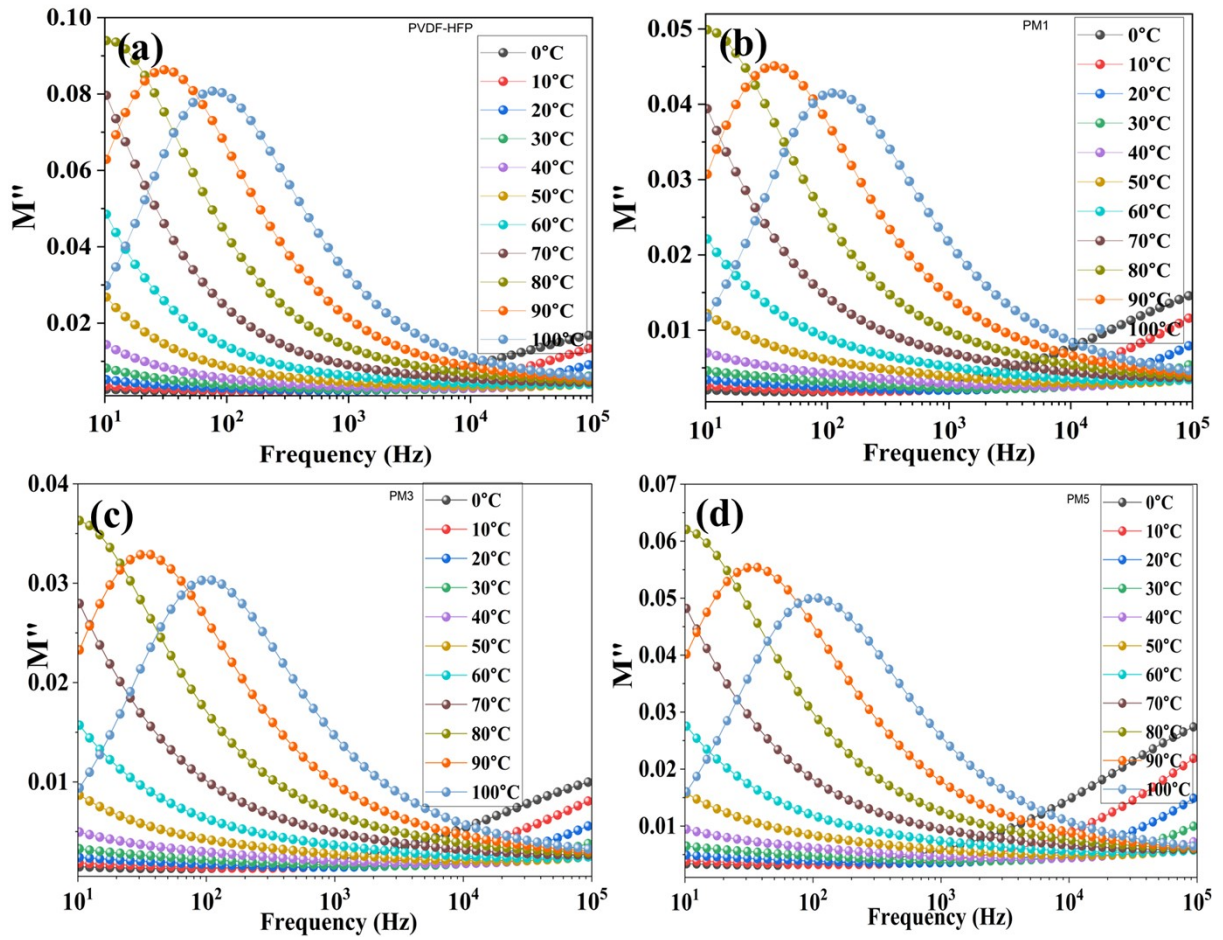

**Figure S9**  $M''$  as a function of  $f$  and  $T$  for (a) P, (b) PM1, (c) PM3, and (d) PM5 fibre composites

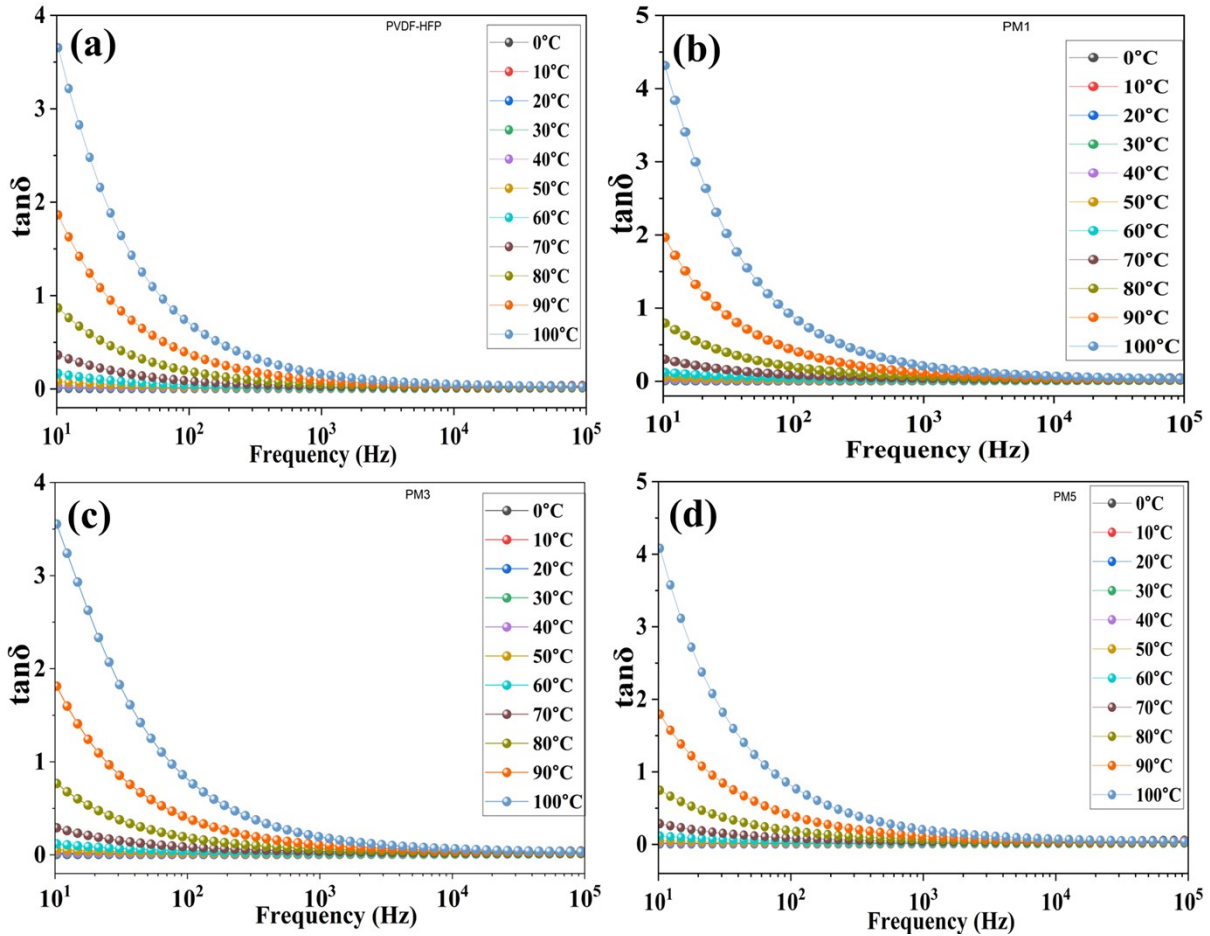

**Figure S10** Loss tangent as a function of  $f$  and  $T$  for (a) P, (b) PM1, (c) PM3, and (d) PM5 fibre composites

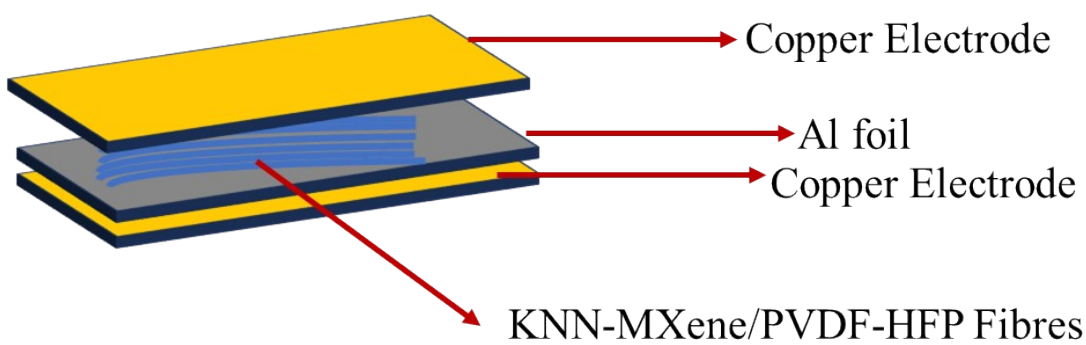

**Figure S11** The schematics of electroding of electrospun fibres for the dielectric measurements. For the dielectric measurements at RT, the aluminium foil is kept as it is on which the fibres were coated

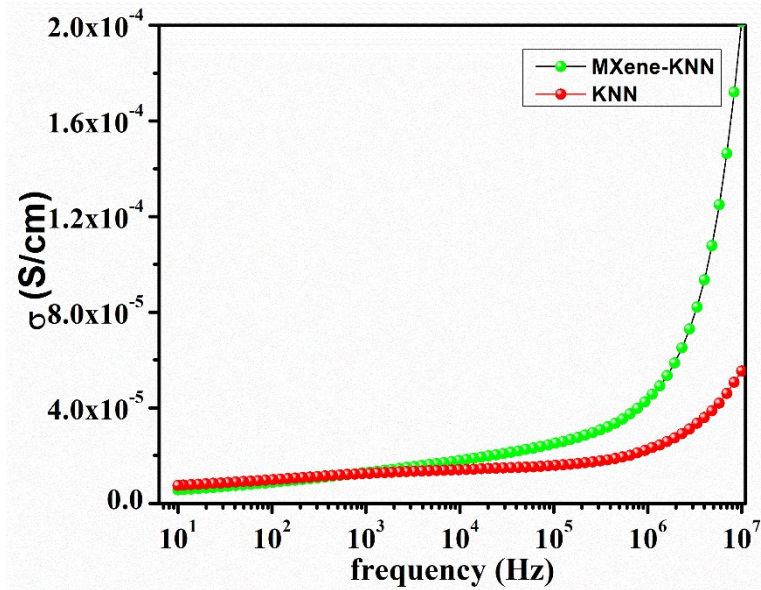

**Figure S12** The extended plot of conductivity measurements of KNN-MXene and KNN ceramics to visualise Jonscher's power law behaviour

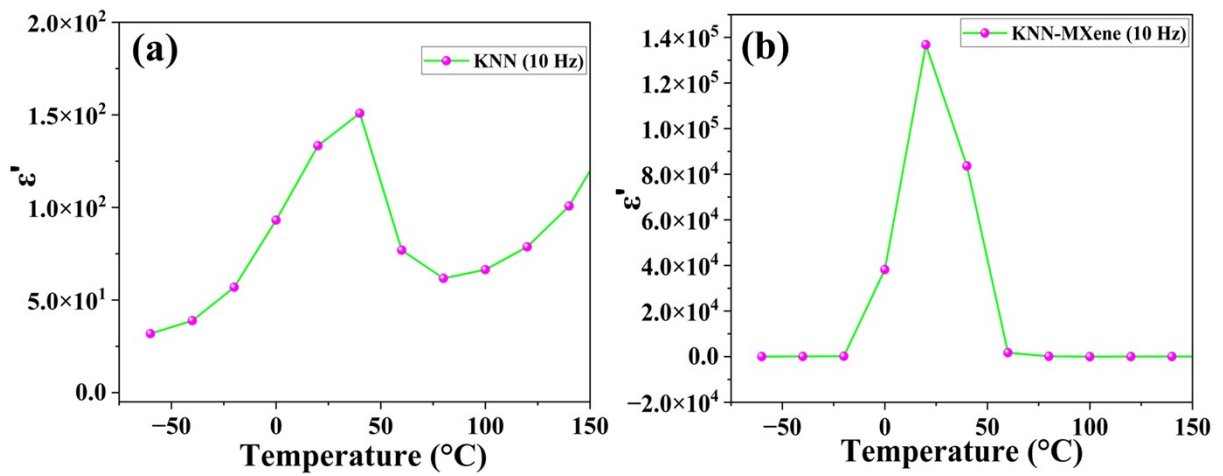

**Figure S13** The observation of a new phase boundary at room temperature ( $\sim 27^\circ\text{C}$ ) in the dielectric constant vs temperature plot for (a) KNN and (b) KNN-MXene ceramics at 10 Hz

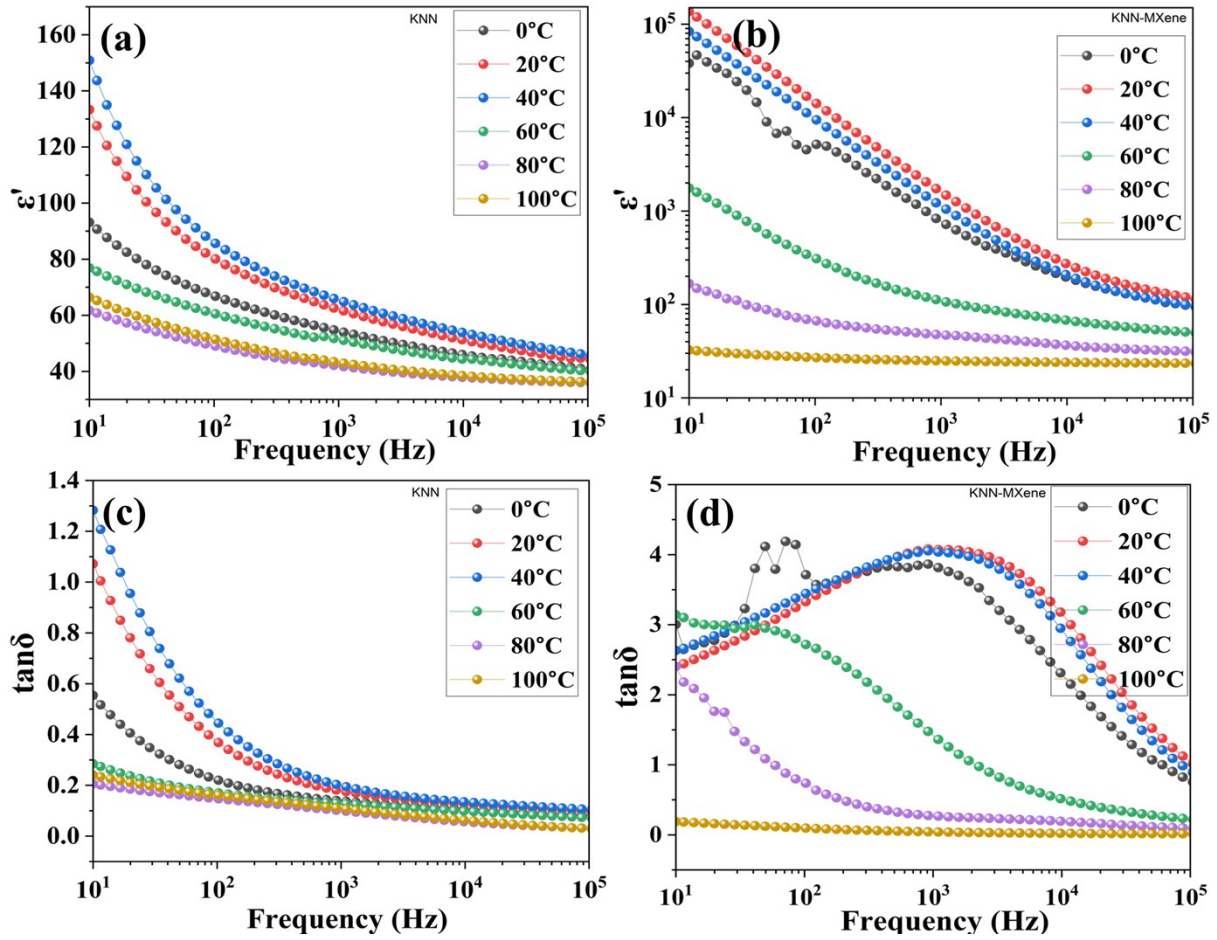

Figure S14 The dielectric constant as a function of frequency and temperature for (a) KNN and (b) KNN-MXene; the loss tangent as a function of frequency and temperature for (a) KNN, (b) KNN-MXene

Table S1 The crystalline phase percentage evaluation in composite fibres using FT-IR analysis

| Sample        | $\beta$ -phase % |
|---------------|------------------|
| Pure PVDF-HFP | 86.3             |
| PM1           | 86.8             |
| PM3           | 86.5             |
| PM5           | 88.5             |

**Table S2:** The qualitative analysis of crystalline phases in composite fibres using Raman spectra

| <b>Sample</b> | <b>I<sub>795</sub> (relative)</b> | <b>I<sub>840</sub>(relative )</b> | <b>Ratio (I<sub>840</sub>/I<sub>795</sub>)</b> |
|---------------|-----------------------------------|-----------------------------------|------------------------------------------------|
| PVDF-HFP      | 0.755                             | 1.000                             | 1.323                                          |
| PM1           | 0.756                             | 1.000                             | 1.317                                          |
| PM3           | 0.674                             | 1.000                             | 1.484                                          |
| PM5           | 0.759                             | 1.000                             | 1.318                                          |

**Table S3:** The conductivity values of composite fibres at ~1 kHz and room temperature

| <b>Sample</b> | <b><math>\sigma</math>(pS/cm)</b> |
|---------------|-----------------------------------|
| PVDF-HFP      | 10.8                              |
| PM1           | 22.3                              |
| PM3           | 24.9                              |
| PM5           | 15.5                              |
